# Supplementary material for: Evolution of General Practitioners’ Preferences for Antipsychotics in France, 2003–2010
Source: Atypon-hosted journal article supplement (doi:10.1176/appi.ps.201400020), 2015-01-15
Supplement: appi.ps.201400020.ds001.pdf [file appi.ps.201400020.ds001.pdf]

Supplemental Table 1. Characteristics of antipsychotic prescribers and according to their preferred drug in 2010 (n=347 general practitioners) Data Supplement for Gallini et al. (10.1176/appi.ps.201400020)

| 2010 GPs' characteristics                             | Antipsychotic preference in 2010 |      |                           |      |                            |      |                       |      | p-value† |
|-------------------------------------------------------|----------------------------------|------|---------------------------|------|----------------------------|------|-----------------------|------|----------|
|                                                       | Total prescribers<br>n=347       |      | First generation<br>n=125 |      | Second generation<br>n=173 |      | No preference<br>n=49 |      |          |
|                                                       | N                                | %    | N                         | %    | N                          | %    | N                     | %    |          |
| Age year) median<br>[interquartile range]             | 57 [51-61]                       |      | 58 [53-62]                |      | 55 [50-60]                 |      | 57 [52-60]            |      | <.001    |
| Gender                                                |                                  |      |                           |      |                            |      |                       |      | .174     |
| Male                                                  | 324                              | 93.4 | 120                       | 96.0 | 157                        | 90.7 | 47                    | 95.9 |          |
| Female                                                | 23                               | 6.6  | 5                         | 4.0% | 16                         | 9.3  | 2                     | 4.1  |          |
| Region                                                |                                  |      |                           |      |                            |      |                       |      | .029     |
| Centre                                                | 28                               | 8.1  | 18                        | 14.4 | 7                          | 4.1  | 3                     | 6.1  |          |
| Centre-East                                           | 54                               | 15.6 | 24                        | 19.2 | 25                         | 14.4 | 5                     | 10.2 |          |
| North-East                                            | 90                               | 25.9 | 24                        | 19.2 | 53                         | 30.6 | 13                    | 26.5 |          |
| West                                                  | 43                               | 12.4 | 14                        | 11.2 | 22                         | 12.7 | 7                     | 14.3 |          |
| Paris area                                            | 20                               | 5.8  | 7                         | 5.6  | 11                         | 6.4  | 2                     | 4.1  |          |
| South-East                                            | 72                               | 20.7 | 19                        | 15.2 | 41                         | 23.7 | 12                    | 24.5 |          |
| South-West                                            | 40                               | 11.5 | 19                        | 15.2 | 14                         | 8.1  | 7                     | 14.3 |          |
| Number of consultations<br>per year for all patients  |                                  |      |                           |      |                            |      |                       |      | .496     |
| ≤ 2908                                                | 87                               | 25.1 | 34                        | 27.2 | 38                         | 22.0 | 15                    | 30.6 |          |
| 2908 - 5170                                           | 174                              | 50.1 | 64                        | 51.2 | 85                         | 49.1 | 25                    | 51.0 |          |
| > 5170                                                | 86                               | 24.8 | 27                        | 21.6 | 50                         | 28.9 | 9                     | 18.4 |          |
| Share of consultations for<br>patients > 65 years old |                                  |      |                           |      |                            |      |                       |      | .060     |
| ≤ 19%                                                 | 87                               | 25.1 | 19                        | 15.2 | 55                         | 31.8 | 13                    | 26.5 |          |
| 19 – 35%                                              | 174                              | 50.1 | 72                        | 57.6 | 79                         | 45.7 | 23                    | 47.0 |          |
| > 35%                                                 | 86                               | 24.8 | 34                        | 27.2 | 39                         | 22.5 | 13                    | 26.5 |          |
| Share of consultations with<br>AP prescription        |                                  |      |                           |      |                            |      |                       |      | .148     |
| ≤ 0.63%                                               | 87                               | 25.1 | 25                        | 20.0 | 46                         | 26.6 | 16                    | 32.7 |          |
| 0.63 – 1.38%                                          | 174                              | 50.1 | 63                        | 50.4 | 84                         | 48.5 | 27                    | 55.1 |          |

|                                                                    |     |      |    |      |    |      |    |      |       |
|--------------------------------------------------------------------|-----|------|----|------|----|------|----|------|-------|
| > 1.38%                                                            | 86  | 24.8 | 37 | 29.6 | 43 | 24.9 | 6  | 12.2 |       |
| Number of patients with at least 1 AP prescription                 |     |      |    |      |    |      |    |      | <.001 |
| ≤ 8                                                                | 103 | 29.7 | 31 | 24.8 | 47 | 27.2 | 25 | 51.0 |       |
| 8-17                                                               | 158 | 45.5 | 52 | 41.6 | 85 | 49.1 | 21 | 42.9 |       |
| > 17                                                               | 86  | 24.8 | 42 | 33.6 | 41 | 23.7 | 3  | 6.1  |       |
| Mean age of patients at their first AP prescription over 2003-2010 |     |      |    |      |    |      |    |      | .078  |
| ≤ 47.4 years                                                       | 87  | 25.1 | 21 | 16.8 | 48 | 27.7 | 18 | 36.7 |       |
| 47.4 – 57.5 years                                                  | 174 | 50.1 | 73 | 58.4 | 81 | 46.9 | 20 | 40.8 |       |
| > 57.5 years                                                       | 86  | 24.8 | 31 | 24.8 | 44 | 25.4 | 11 | 22.5 |       |
| Share of AP consultations with ≥ 2 concomitant AP prescriptions    |     |      |    |      |    |      |    |      | .071  |
| 0%                                                                 | 91  | 26.2 | 34 | 27.2 | 38 | 22.0 | 19 | 38.8 |       |
| >0 – 21%                                                           | 170 | 49.0 | 66 | 52.8 | 84 | 48.5 | 20 | 40.8 |       |
| > 21%                                                              | 86  | 24.8 | 25 | 20.0 | 51 | 29.5 | 10 | 20.4 |       |

Abbreviations: AP: antipsychotic

Sex and region are expressed as number and percentages.

Age is expressed as median [interquartile range]. Other quantitative variables are expressed as number and percentages in the first quartile, second and third quartiles, and last quartile of the variable distribution for the 347 physicians.

† Statistical tests: Kruskal-Wallis test was used for age; chi<sup>2</sup> tests or exact Fisher tests were used for the other variables.

Source: IMS Health, Disease Analyzer™, 2003-2010.

Supplemental Figure. Trends in prescriptions (A) and preferences (B) of general practitioners for antipsychotic agents, 2003 – 2010

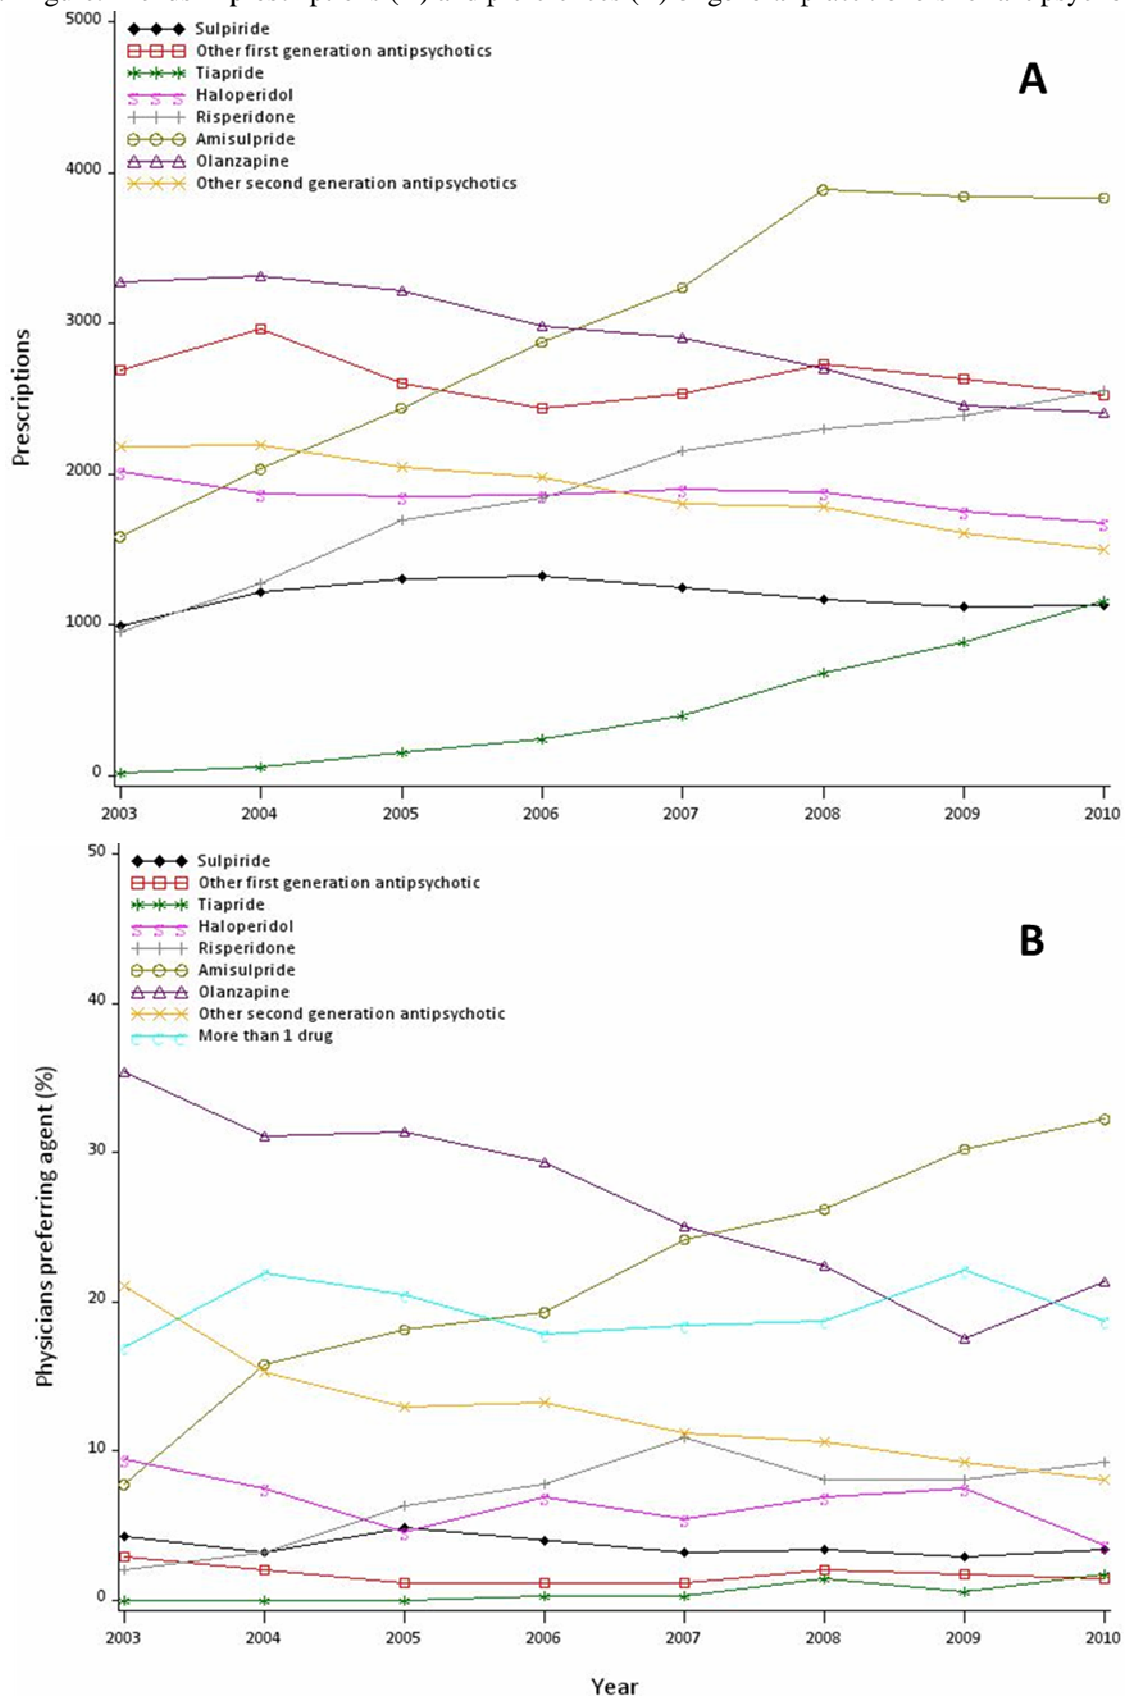

2003 – 2010

Other first generation antipsychotics include chlorpromazine, flupentixol, fluphenazine, loxapine, penfluridol, periciazine, pimozide, pipamperone, pipotiazine, thioridazine and zuclopenthixol. Other second generation antipsychotics include aripiprazole and clozapine. The series “more than 1 drug” represent physicians who equally preferred more than one antipsychotic drug in a given year. Source: IMS Health, Disease Analyzer™, 2003-2010.

Supplemental Table 2. Distribution of antipsychotic preferences in 2003 and 2010 and changes in preference between 2003 and 2010 (n=347 general practitioners)

| Drug name<br># and % preferring agent |                          | Preferred drug in 2010        |                              |                                 |                             |                               |                              |                            |                             |                                |
|---------------------------------------|--------------------------|-------------------------------|------------------------------|---------------------------------|-----------------------------|-------------------------------|------------------------------|----------------------------|-----------------------------|--------------------------------|
|                                       |                          | Amisulpride<br>N=12<br>(3.5%) | Olanzapine<br>N=32<br>(9.2%) | Risperidone<br>N=112<br>(32.3%) | Other SGAs<br>N=6<br>(1.7%) | Haloperidol<br>N=13<br>(3.7%) | Sulpiride<br>N=74<br>(21.3%) | Tiapride<br>N=28<br>(8.1%) | Other FGAs<br>N=5<br>(1.4%) | More than 1<br>N=65<br>(18.7%) |
| Preferred drug in 2003                | Amisulpride N=15 (4.3%)  | 20.0                          | 13.3                         | 33.3                            | 0                           | 13.3                          | 6.7                          | 0                          | 0                           | 13.3                           |
|                                       | Olanzapine N=7 (2.0%)    | 0                             | 28.6                         | 28.6                            | 14.3                        | 0                             | 0                            | 14.3                       | 0                           | 14.3                           |
|                                       | Risperidone N=27 (7.8%)  | 7.4                           | 14.8                         | 59.3                            | 3.7                         | 0                             | 11.1                         | 0                          | 0                           | 3.7                            |
|                                       | Other SGAs N=0 (.0%)     | 0                             | 0                            | 0                               | 0                           | 0                             | 0                            | 0                          | 0                           | 0                              |
|                                       | Haloperidol N=33 (9.5%)  | 3.0                           | 18.2                         | 36.4                            | 3.0                         | 15.1                          | 6.1                          | 3.0                        | 0                           | 15.1                           |
|                                       | Sulpiride N=123 (35.4%)  | 1.6                           | 4.1                          | 21.1                            | .8                          | 1.6                           | 42.3                         | 7.3                        | 0.8                         | 20.3                           |
|                                       | Tiapride N=73 (21.0%)    | 1.4                           | 13.7                         | 32.9                            | 0                           | 1.4                           | 12.3                         | 16.4                       | 2.7                         | 19.2                           |
|                                       | Other FGAs N=10 (2.9%)   | 0                             | 10.0                         | 60.0                            | 0                           | 0                             | 20.0                         | 0                          | 0                           | 10.0                           |
|                                       | More than 1 N=59 (17.0%) | 5.1                           | 3.4                          | 35.6                            | 3.4                         | 5.1                           | 8.5                          | 8.5                        | 3.4                         | 27.1                           |

Abbreviations: FGA: first-generation antipsychotic, SGA: second-generation antipsychotic

Numbers in each cell represents line percentages (e.g. 20% of physicians who preferred amisulpride in 2003 still preferred this drug in 2010).

Other FGAs include chlorpromazine, flupentixol, fluphenazine, loxapine, penfluridol, periciazine, pimozide, pipamperone, pipotiazine, thioridazine and zuclopenthixol. Other SGAs include aripiprazole and clozapine.

“More than 1” denotes physicians who equally preferred more than one antipsychotic medication. In 2003, 18 (30.5%) physicians preferred >1 FGA, 7 (11.9%) physicians preferred >1 SGA and 34 (57.6%) equally preferred a FGA and a SGA. In 2010, 5 (7.7%) physicians preferred >1 FGA, 11 (16.9%) physicians preferred >1 SGA and 49 (75.4%) equally preferred a FGA and a SGA.

Source: IMS Health, Disease Analyzer™, 2003-2010.
